# Supplementary material for: Structural Changes Enable Start Codon Recognition by the Eukaryotic Translation Initiation Complex
Source: PubMed Central journal article supplement (PMC4217140; doi:10.1016/j.cell.2014.10.001), 2014-10-23
Supplement: mmc1.pdf [file mmc1.pdf]

**Table S1. Refinement and Model Statistics, Related to Figure 1**

| <b>Data Collection</b>                          | <b>py48S PIC</b> | <b>PIC-2</b> |
|-------------------------------------------------|------------------|--------------|
| Particles                                       | 29,698           | 100,709      |
| Pixel size (Å)                                  | 1.34             | 1.34         |
| Defocus range (µm)                              | 1.6-4.0          | 1.6-4.0      |
| Voltage (kV)                                    | 300              | 300          |
| Electron dose (e <sup>-</sup> Å <sup>-2</sup> ) | 28               | 28           |
| <b>Model Composition</b>                        |                  |              |
| Non-hydrogen atoms                              | 81,867           | 77,702       |
| Protein residues                                | 5,389            | 5,109        |
| RNA bases                                       | 1,874            | 1,778        |
| <b>Refinement</b>                               |                  |              |
| Resolution used for refinement (Å)              | 4.10             | 3.85         |
| Map sharpening B-factor (Å)                     | -52              | -88          |
| Average B-factor (Å)                            | 201              | 189          |
| R factor #                                      | 28.9             | 26.9         |
| Fourier Shell Correlation (FSC)*                | 0.82             | 0.85         |
| <b>Rms deviations</b>                           |                  |              |
| Bonds (Å)                                       | 0.006            | 0.007        |
| Angles (°)                                      | 1.07             | 1.18         |
| <b>Ramachandran plot</b>                        |                  |              |
| Favored (%)                                     | 82.7             | 82.5         |
| Outliers (%)                                    | 8.0              | 8.1          |

# Rfactor =  $\sum ||F_{obs}| - |F_{calc}| / \sum |F_{obs}|$

\* FSC =  $\sum(N_{shell} FSC_{shell}) / \sum(N_{shell})$ , where  $FSC_{shell}$  is the FSC in a given shell,  $N_{shell}$  is the number of “structure factors” in the shell.  $FSC_{shell} = \Sigma(F_{model} F_{EM}) / (\sqrt{\Sigma(|F|_{model}^2)} \sqrt{\Sigma(|F|_{EM}^2)})$
